# Supplementary material for: The Effect of Cold Showering on Health and Work: A Randomized Controlled Trial
Source: PubMed Central journal article supplement (PMC5025014; doi:10.1371/journal.pone.0161749), 2016-09-15
Supplement: pone.0161749.s003.pdf [file pone.0161749.s003.pdf]

Medical Ethical Review Committee AMC  
Secretary  
Room E2-170  
P.O. Box 22660  
1100 DD Amsterdam

Date: August 27th 2014

**RE:** Submission of research protocol for assessment of the Medical Research Involving Human Subjects Act

Dear Secretary,

Herewith I submit our research protocol for assessment of the Medical Research Involving Human Subjects Act that obligates official medical ethical review.

Title: The COOL Challenge: measuring the effect of daily cold exposure on quality of health. A proof-of-concept trial

Primary investigator: Prof.dr. Frings-Dresen  
Department: Coronel Institute  
Room nr: K0-122  
Email: [m.fring@amc.uva.nl](mailto:m.fring@amc.uva.nl)

Researcher executive: Dr. G.A. Buijze  
Email: [g.a.buijze@amc.uva.nl](mailto:g.a.buijze@amc.uva.nl)

1. This review is for the purpose of:  
 doubt regarding whether or not the Medical Research Involving Human Subjects Act applies to this study protocol
2. The research question is: What is the effect of a daily cold shower during 30 consecutive days on quality of life and work-related functioning?
3. Research participants are: healthy volunteers (that are not used to shower (hot-to-)cold). For safety reasons, participants will be instructed not to shower cold for longer than 90 seconds.
4. The (estimated) amount of participants/files: +/- 1000
5. Enrolment of participants will be done by use of: social media (twitter,facebook,email)
6. Informed consent procedure:  
 will not be applied,  
 written,  
 oral

Explanation: This proof-of-concept study has a straightforward web-based platform and it can only be performed if volunteers can enroll online and provide online informed consent to participate and fill out questionnaires through a website before and after the period of 30 days.

7. The burden and risks to the participant in the performance of the research are:  
(For example: ( frequency of ) tests , procedures , observations, extra hospital visits, time load, sampling of body material). There are several options possible:

Retrospective data are collected and processed (file study)

- prospective data are collected and processed .
- tissue is used that, during normal diagnosis or care has been collected .
- 3 times 2 questionnaires.
- a one-time urine sample.
- extra blood will be sampled during regular visits.
- Other

8. Questionnaires: ( to assess the possibility that the psychological integrity of the subject is affected)

- are enclosed
- not applicable

9. The confidentiality of medical and personal information is safeguarded as follows::

- the personal data are encrypted and only the researcher has access to the encryption key
- The survey can never be traced back to the person (anonymous)
- Other.

10. Review by another accredited IRB of this research

- is attached
- not applicable

11. Expected start date: November 1st 2014

Expected end date: April 1st 2015

Sincerely,

Dr. Geert A. Buijze

Orthopedic Resident and Researcher

Attachments: SF-36 and Health Performance Questionnaire (HPQ)
