# Supplementary material for: The Effect of Cold Showering on Health and Work: A Randomized Controlled Trial
Source: PubMed Central journal article supplement (PMC5025014; doi:10.1371/journal.pone.0161749), 2016-09-15
Supplement: pone.0161749.s005.pdf [file pone.0161749.s005.pdf]

Aan mevrouw prof.dr. M.H.W. Frings-Dresen  
Coronel Instituut  
K0-122

Amsterdam, 3 september 2014  
uw kenmerk:  
ons kenmerk: W14\_244 # 14.17.0296  
betreft:

**Medisch Ethische Toetsingscommissie**  
E2-170  
doorkiesnummer: 566 7389

Uw brief: **The COOL Challenge: measuring the effect of daily cold exposure on quality of health. A proof-of-concept trial**

Geachte mevrouw Frings-Dresen,

Uw brief d.d. 27 augustus 2014 betreffende bovengenoemde studie is op 2 september jl. besproken in de vergadering van het dagelijks bestuur.

Het betreft een onderzoek met gezonde vrijwilligers naar de vraag of een dagelijkse koude douche gedurende 30 dagen de kwaliteit van leven en het werk-gerelateerd functioneren verbetert.

Het dagelijks bestuur is van oordeel dat bovengenoemde studie niet valt binnen de reikwijdte van de Wet medisch-wetenschappelijk onderzoek met mensen, aangezien er geen sprake is van wetenschappelijk onderzoek zoals bedoeld in artikel 1, eerste lid onder b van de WMO, daar er geen sprake is van een medisch-wetenschappelijk onderzoek, omdat er geen sprake is van een medisch-wetenschappelijke vraagstelling.

Een formele beoordeling door onze commissie is derhalve niet noodzakelijk.

Met vriendelijke groet,  
namens de Medisch Ethische Toetsingscommissie

A handwritten signature in dark ink, appearing to read 'T. Groenveld'.

Mw. T. Groenveld,  
ambtelijk secretaris

Bijlage: verklaring in het Engels (z.o.z.)

c.c. per email: [g.a.buijze@amc.uva.nl](mailto:g.a.buijze@amc.uva.nl)

To whom it may concern,

Referring to our letter of September 3<sup>rd</sup>, 2014 (reference number W14\_244 # 14.17.0296) we are pleased to confirm that the Medical Research Involving Human Subjects Act (WMO) does not apply to the above mentioned study and that an official approval of this study by our committee is not required.

Yours sincerely,  
on behalf of the Medical Ethics Review Committee,

A handwritten signature in black ink, appearing to read 'T. Groenveld', written in a cursive style.

Mrs. T. Groenveld  
secretary
